# Supplementary material for: Solution structure of the 5′-terminal hairpin of the 7SK small nuclear RNA
Source: PubMed Central journal article supplement — RNA. 2016 Dec;22(12):1844–58. doi: 10.1261/rna.056523.116 (PMC5113205; doi:10.1261/rna.056523.116), 2016-12
Supplement: supp_056523.116_Supplemental_Fig_S1.pdf [file supp_056523.116_Supplemental_Fig_S1.pdf]

**(A)**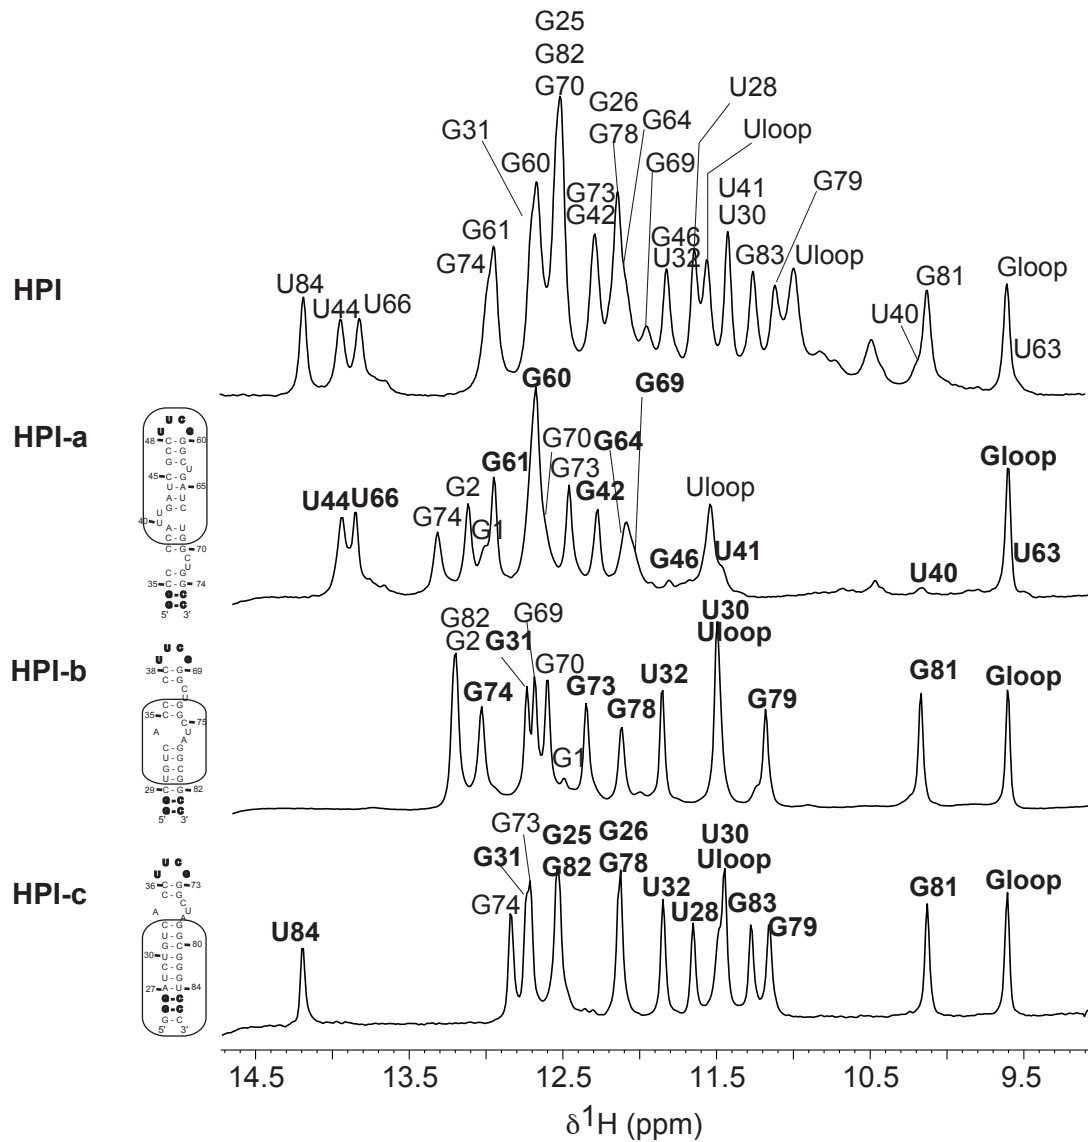**(B)**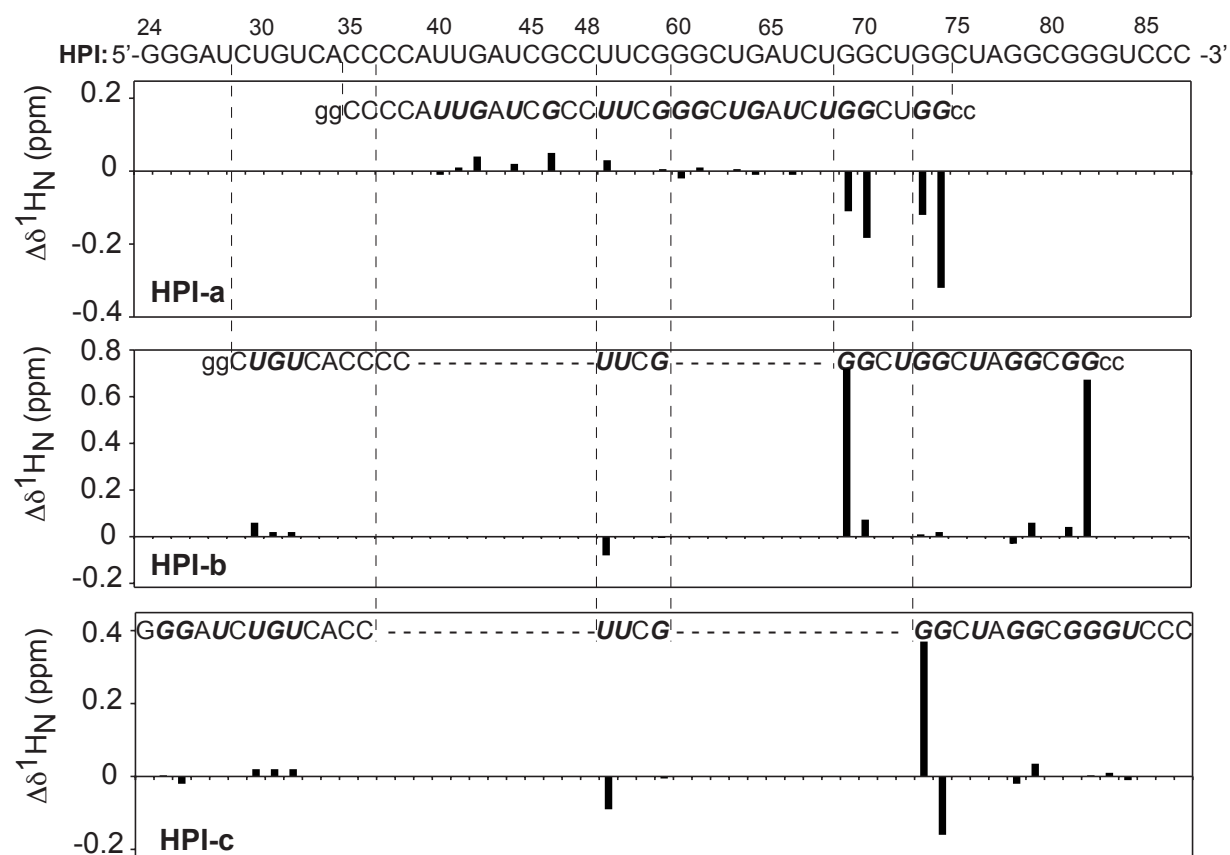

**Supplemental Figure S1: Analysis of exchangeable protons for the “Divide and Conquer approach”**

(A) Imino protons regions of 1D spectra of full-length HPI, HPI-a, HPI-b and HPI-c recorded at 10°C in 50 mM sodium phosphate buffer at pH 6.2. Assignments were based on analysis of NOESY experiments. Nucleotides which chemical shifts overlap with those of full-length HPI, are indicated in bold. The secondary structures of the three subdomains are shown on the left. Regions which patterns were used in the data analysis of full-length HPI are encircled. (B) Bar graph indicating the chemical shift differences of imino protons between the full-length HPI and smaller constructs. The biggest differences are located in regions comprising sequence variations with respect to the full-length HPI.
