# Supplementary material for: Solution structure of the 5′-terminal hairpin of the 7SK small nuclear RNA
Source: PubMed Central journal article supplement — RNA. 2016 Dec;22(12):1844–58. doi: 10.1261/rna.056523.116 (PMC5113205; doi:10.1261/rna.056523.116), 2016-12
Supplement: supp_056523.116_Supplemental_Fig_S2.pdf [file supp_056523.116_Supplemental_Fig_S2.pdf]

(A)

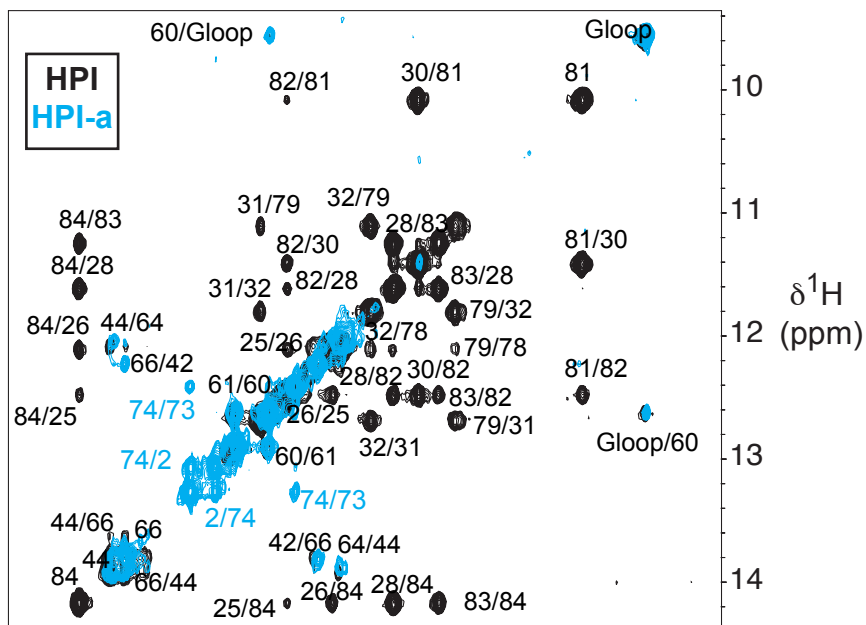

(B)

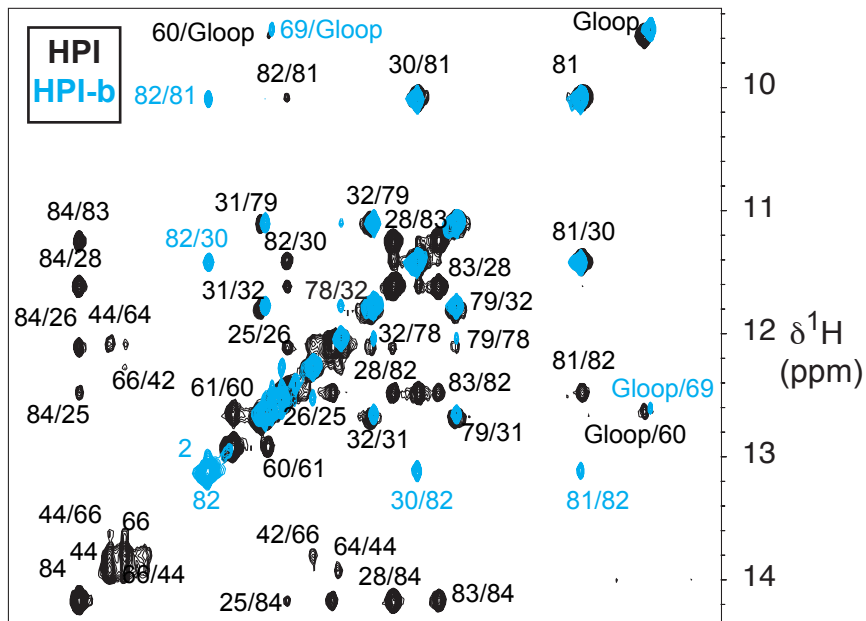

(C)

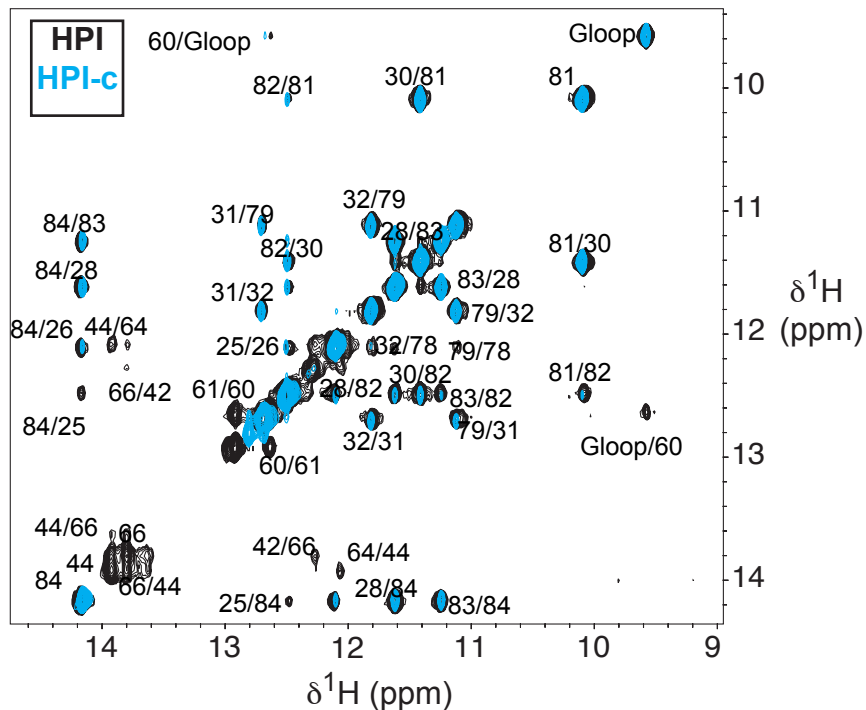

**Supplemental Figure S2: Analysis of exchangeable protons for the “Divide and Conquer approach”**

Imino/imino protons regions of NOESY spectra recorded at 15°C in 90/10 H<sub>2</sub>O/D<sub>2</sub>O with a 400ms mixing time. **(A)** Overlay of HPI (black) and HPI-a (blue). **(B)** Overlay of HPI (black) and HPI-a (blue). **(C)** Overlay of HPI (black) and HPI-c (blue). Assignments that originate from the small constructs that differ from HPI, are indicated in blue.
