# Supplementary material for: Solution structure of the 5′-terminal hairpin of the 7SK small nuclear RNA
Source: PubMed Central journal article supplement — RNA. 2016 Dec;22(12):1844–58. doi: 10.1261/rna.056523.116 (PMC5113205; doi:10.1261/rna.056523.116), 2016-12
Supplement: supp_056523.116_Supplemental_Fig_S3.pdf [file supp_056523.116_Supplemental_Fig_S3.pdf]

**(A)**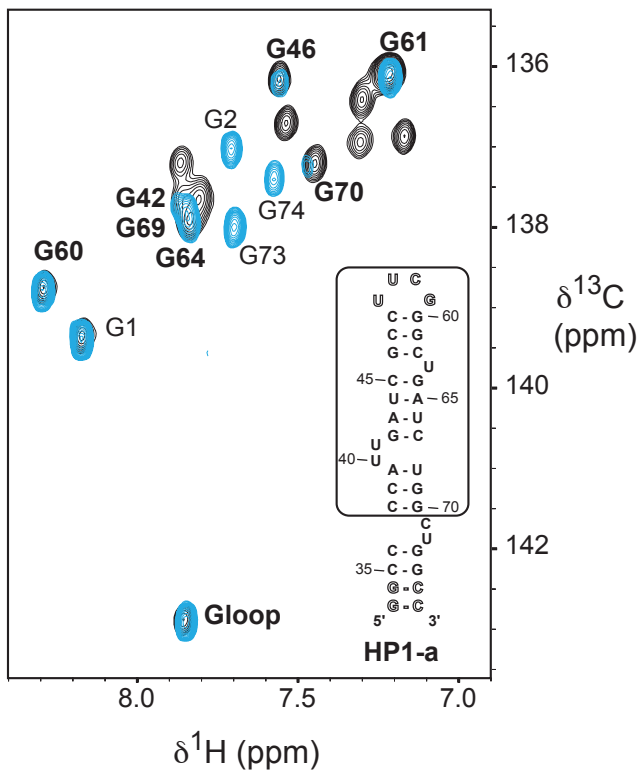**(B)**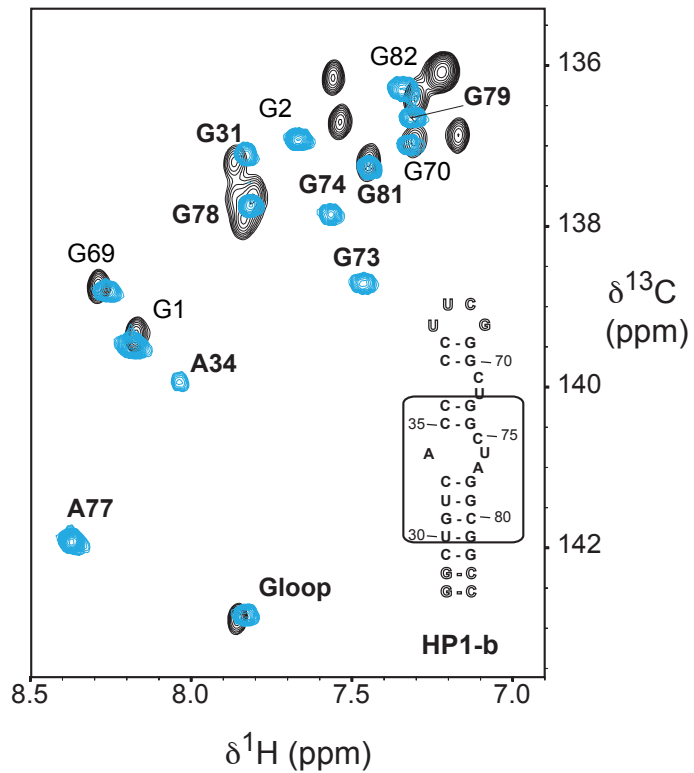**(C)**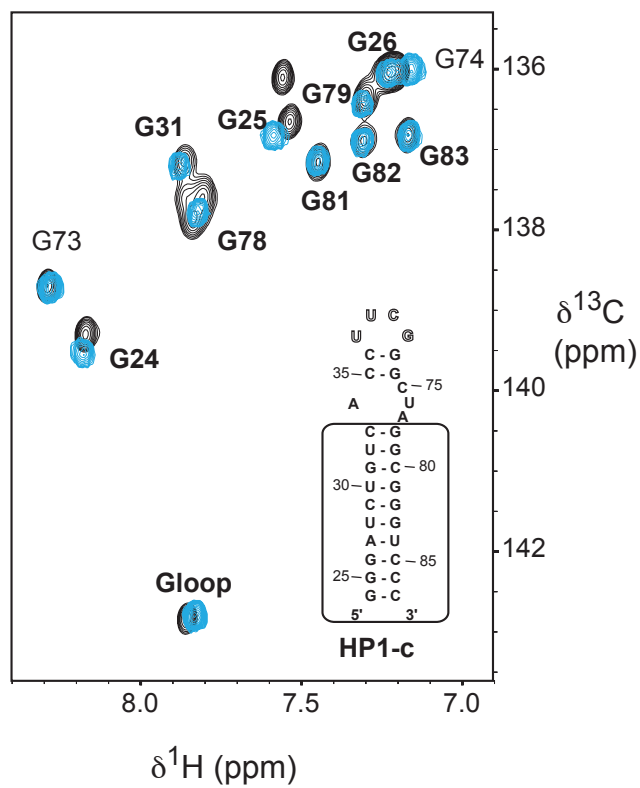**(D)**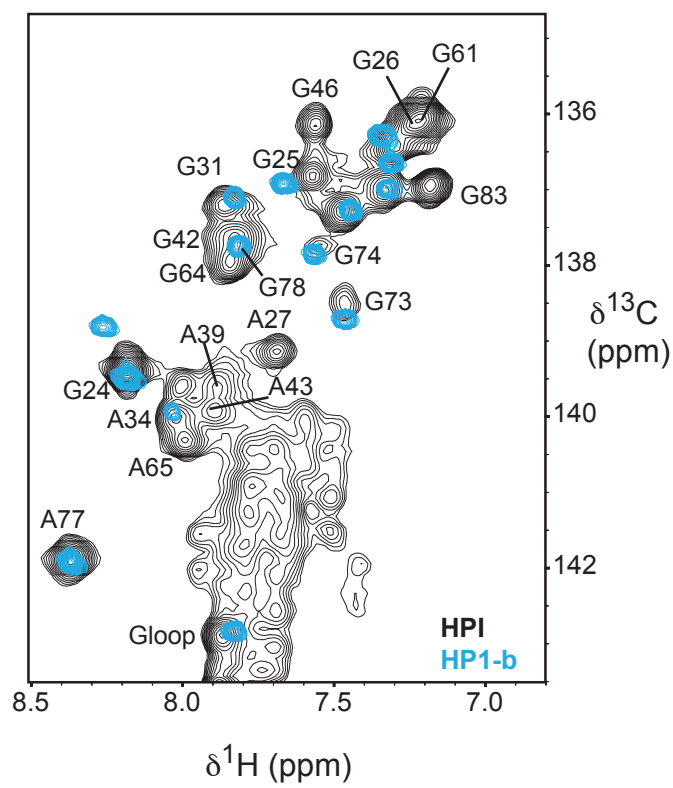**Supplemental Figure S3**

**Supplemental Figure S3: Analysis of non-exchangeable protons for the “Divide and Conquer approach”**

Overlays of regions of  $^1\text{H}$ - $^{13}\text{C}$  HSQC spectra showing the aromatic H8-C8 of HPI and the three sub-domains HPI-a, HPI-b and HPI-c, at 30°C. **(A)**  $^1\text{H}$ - $^{13}\text{C}$  HSQC spectra showing the aromatic H8-C8 of selectively labeled [ $^{13}\text{C}/^{15}\text{N}$ -G] HPI (black) and [ $^{13}\text{C}/^{15}\text{N}$ -G] HPI-a (blue), recorded at 30°C. **(B)**  $^1\text{H}$ - $^{13}\text{C}$  HSQC spectra showing the aromatic H8-C8 of selectively labeled [ $^{13}\text{C}/^{15}\text{N}$ -G] HPI (black) and [ $^{13}\text{C}/^{15}\text{N}$ -G/A] HPI-b (blue), recorded at 30°C. **(C)**  $^1\text{H}$ - $^{13}\text{C}$  HSQC spectra showing the aromatic H8-C8 of selectively labeled [ $^{13}\text{C}/^{15}\text{N}$ -G] HPI (black) and [ $^{13}\text{C}/^{15}\text{N}$ -G] HPI-c (blue), recorded at 30°C. **(D)**  $^1\text{H}$ - $^{13}\text{C}$  TROSY-HSQC spectra showing the aromatic H8-C8 of fully labeled  $^{13}\text{C}/^{15}\text{N}$  HPI (black) and selectively labeled [ $^{13}\text{C}/^{15}\text{N}$ -A/G] HPI-b (blue), recorded at 30°C. It is worth noting that G73 and G74 that were not visible in the  $^1\text{H}$ - $^{13}\text{C}$  HSQC spectrum (B), show up and exhibit chemical shifts similar to those observed in HPI-b. In addition, chemical shifts of A34 and A77 are identical in HPI-b and HPI.
