# Supplementary material for: Solution structure of the 5′-terminal hairpin of the 7SK small nuclear RNA
Source: PubMed Central journal article supplement — RNA. 2016 Dec;22(12):1844–58. doi: 10.1261/rna.056523.116 (PMC5113205; doi:10.1261/rna.056523.116), 2016-12
Supplement: supp_056523.116_Supplemental_Fig_S4.pdf [file supp_056523.116_Supplemental_Fig_S4.pdf]

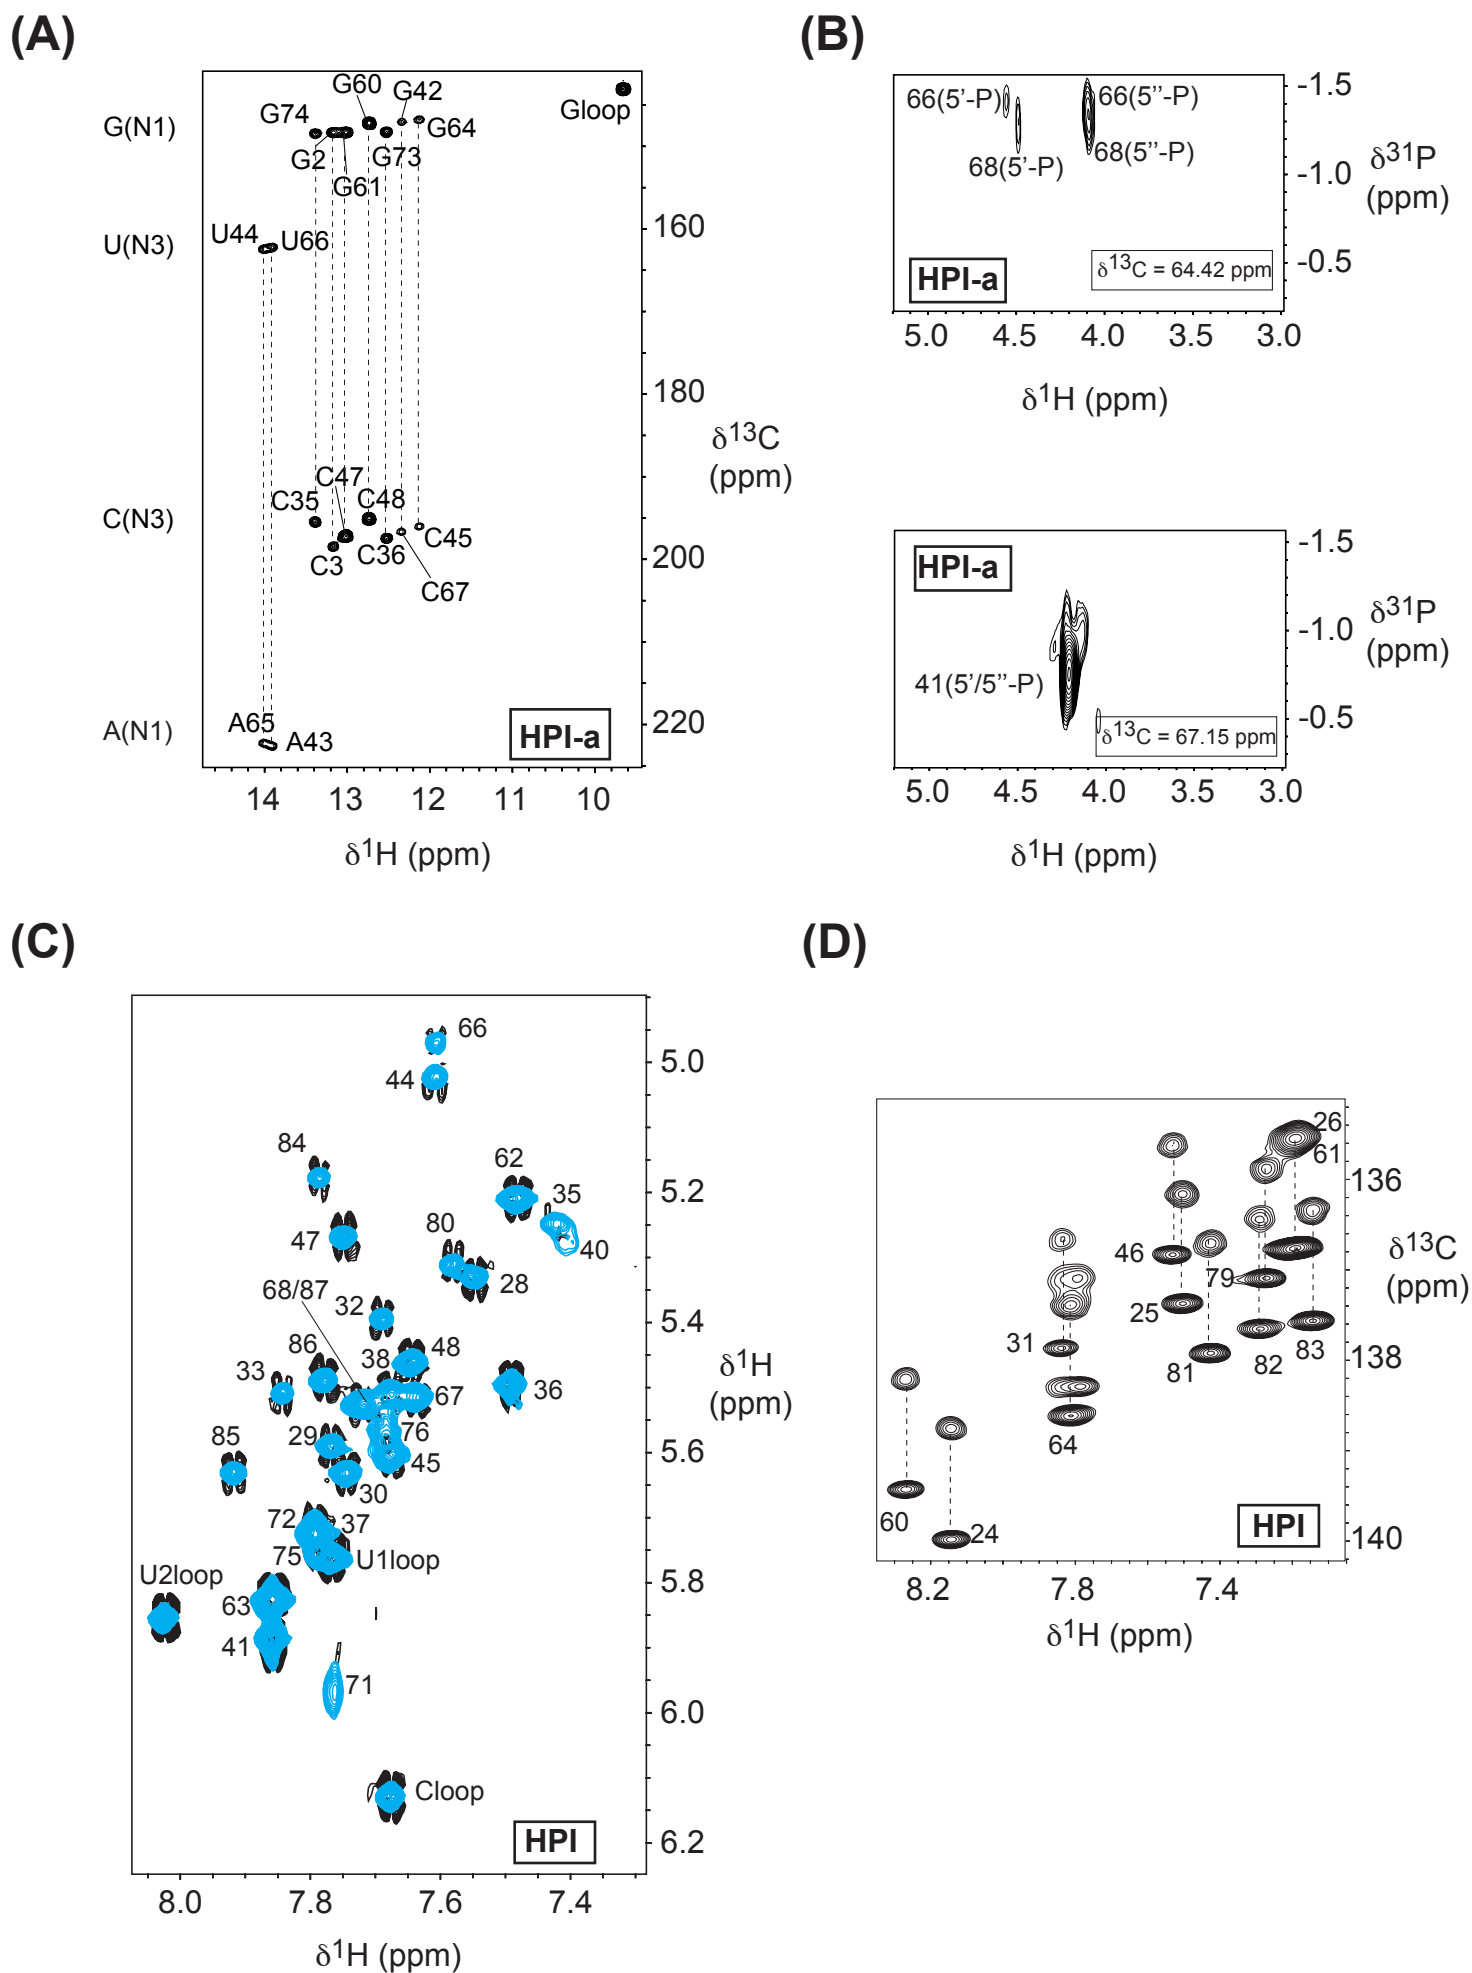

**Supplemental Figure S4**

**Supplemental Figure S4: Standard homonuclear and heteronuclear 2D and 3D correlation experiments used for assignment.**

(A) J(N,N)-HN COSY experiment recorded at 15°C, on HPI-a, in 90/10 H<sub>2</sub>O/D<sub>2</sub>O. (B) Zoom of planes extracted from a 3D-HCP experiment, recorded at 30°C, on HPI-a, in 99.9% D<sub>2</sub>O. (C) Overlay of TOCSY (blue) and 2D COSY-DQF (black) spectra recorded at 30°C, on HPI, showing the H6-H5 region. (D) <sup>1</sup>H-<sup>13</sup>C ipap-HSQC spectrum showing the aromatic H8-C8 for selectively labeled [<sup>13</sup>C/<sup>15</sup>N-G] HPI recorded at 30°C.
