# Supplementary material for: Solution structure of the 5′-terminal hairpin of the 7SK small nuclear RNA
Source: PubMed Central journal article supplement — RNA. 2016 Dec;22(12):1844–58. doi: 10.1261/rna.056523.116 (PMC5113205; doi:10.1261/rna.056523.116), 2016-12
Supplement: supp_056523.116_Supplemental_Fig_S5.pdf [file supp_056523.116_Supplemental_Fig_S5.pdf]

**(A)**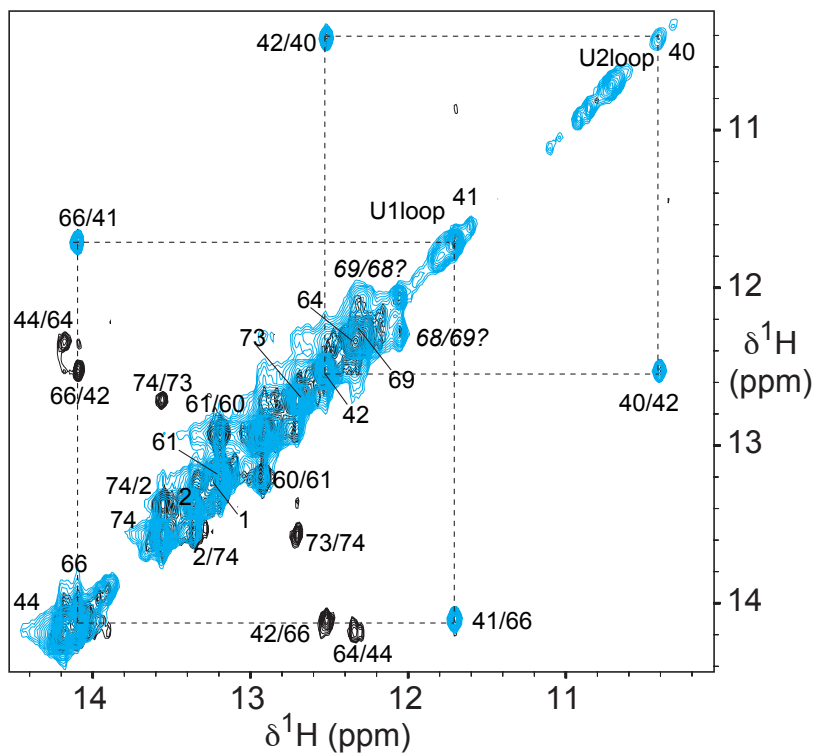**(B)**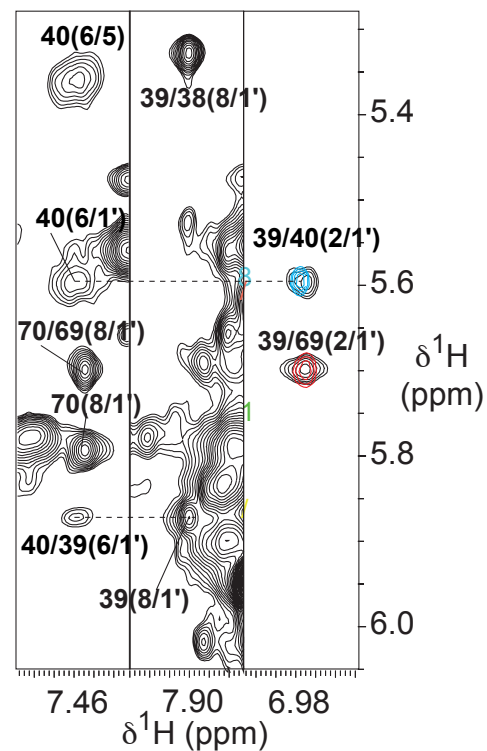**(C)**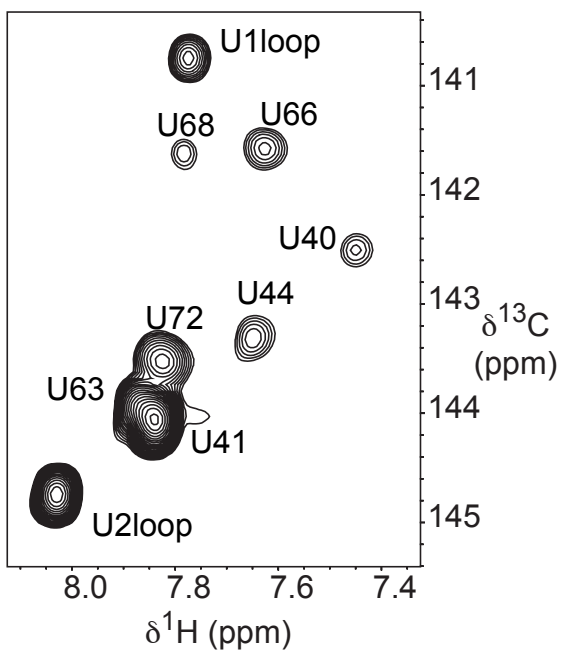**(D)**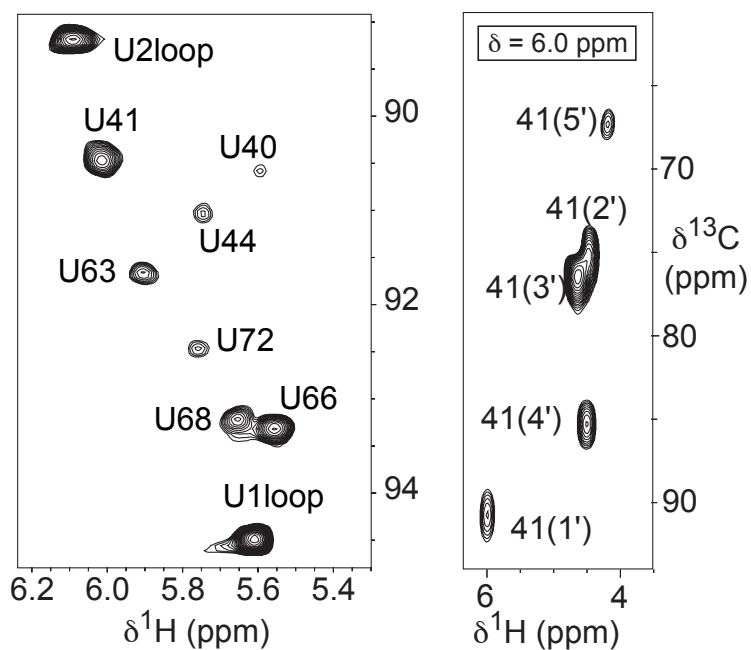

**Supplemental Figure 5**

### Supplemental Figure S5: Assignment of U40 and U41 residues in HPI-a construct

(A) Imino/imino protons region recorded at 10°C in 90/10 H<sub>2</sub>O/D<sub>2</sub>O with mixing times of 50 ms (blue) and 400 ms (black). (B) Zooms of NOESY experiment recorded at 30°C in 99.9% D<sub>2</sub>O, with a mixing time of 400 ms. In the lane 3, a zoom of filtered-NOESY experiment recorded on a selectively labeled [<sup>13</sup>C/<sup>15</sup>N-U] HPI-a is shown in red. A zoom of filtered-NOESY experiment recorded on a selectively labeled [<sup>13</sup>C/<sup>15</sup>N-G] HPI-a is shown in blue. Sequential NOEs involving U40 and A39 are shown. (C) <sup>1</sup>H-<sup>13</sup>C HSQC spectrum showing the aromatic H8-C8 for selectively labeled [<sup>13</sup>C/<sup>15</sup>N-U] HPI-a, recorded at 30°C in 99.9% D<sub>2</sub>O. (D) On the left: <sup>1</sup>H-<sup>13</sup>C HSQC spectrum showing the sugar H1'-C1' for selectively labeled [<sup>13</sup>C/<sup>15</sup>N-U] HPI-a recorded at 30°C in 99.9% D<sub>2</sub>O. On the right: plane extracted at δ(41-H1') = 6.0 ppm from a 3D-HCCH-TOCSY recorded at 30°C, in 99.9% D<sub>2</sub>O.
