# Supplementary material for: Solution structure of the 5′-terminal hairpin of the 7SK small nuclear RNA
Source: PubMed Central journal article supplement — RNA. 2016 Dec;22(12):1844–58. doi: 10.1261/rna.056523.116 (PMC5113205; doi:10.1261/rna.056523.116), 2016-12
Supplement: supp_056523.116_Supplemental_Fig_S7.pdf [file supp_056523.116_Supplemental_Fig_S7.pdf]

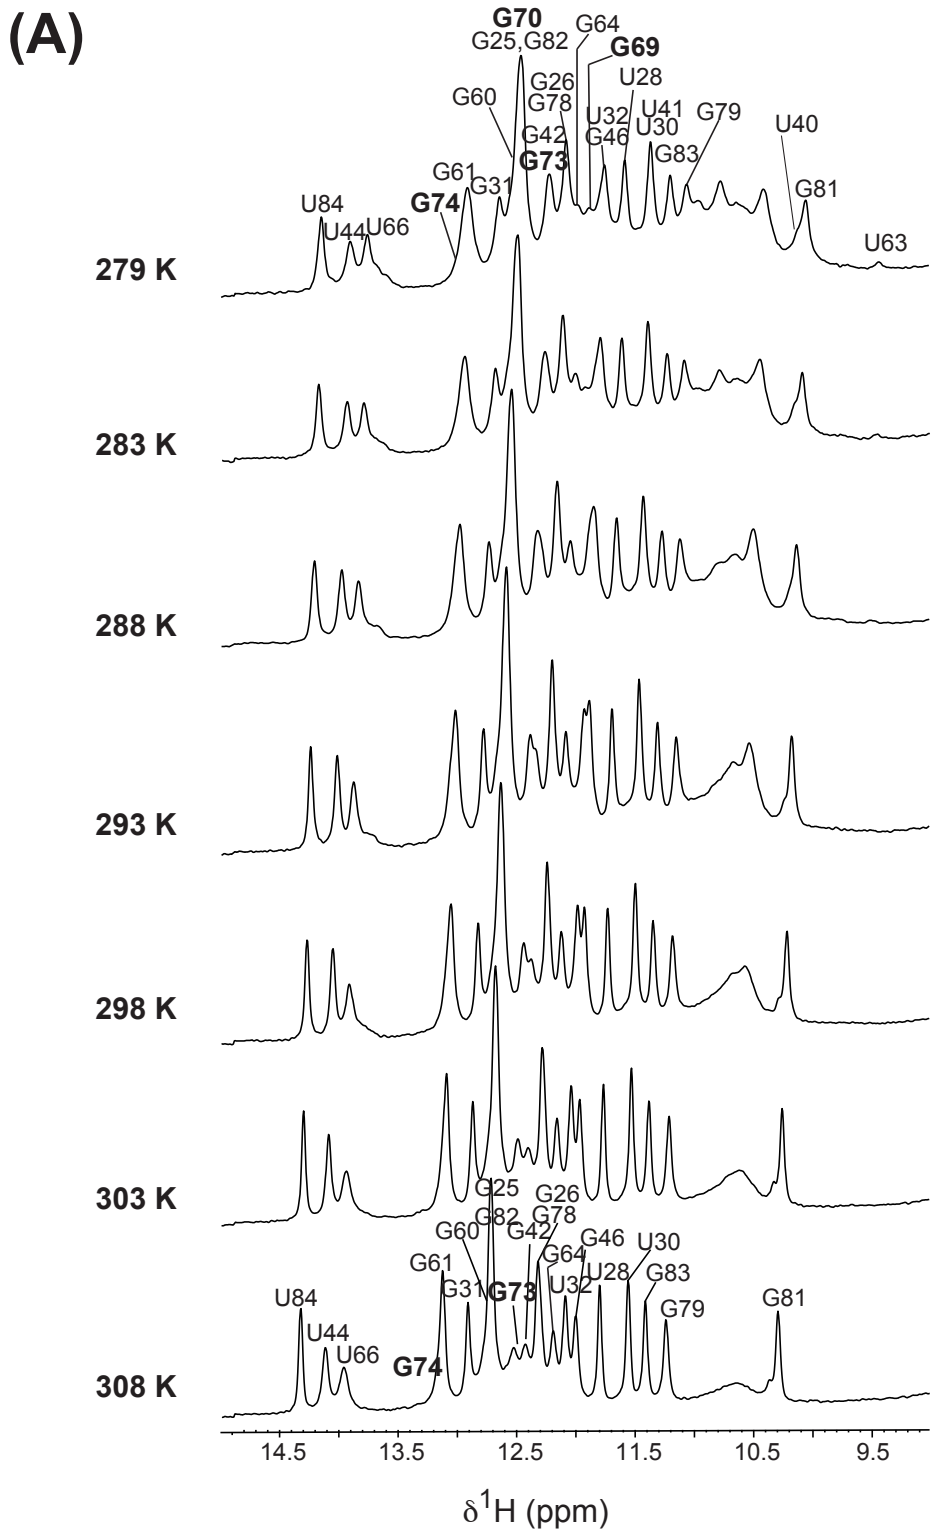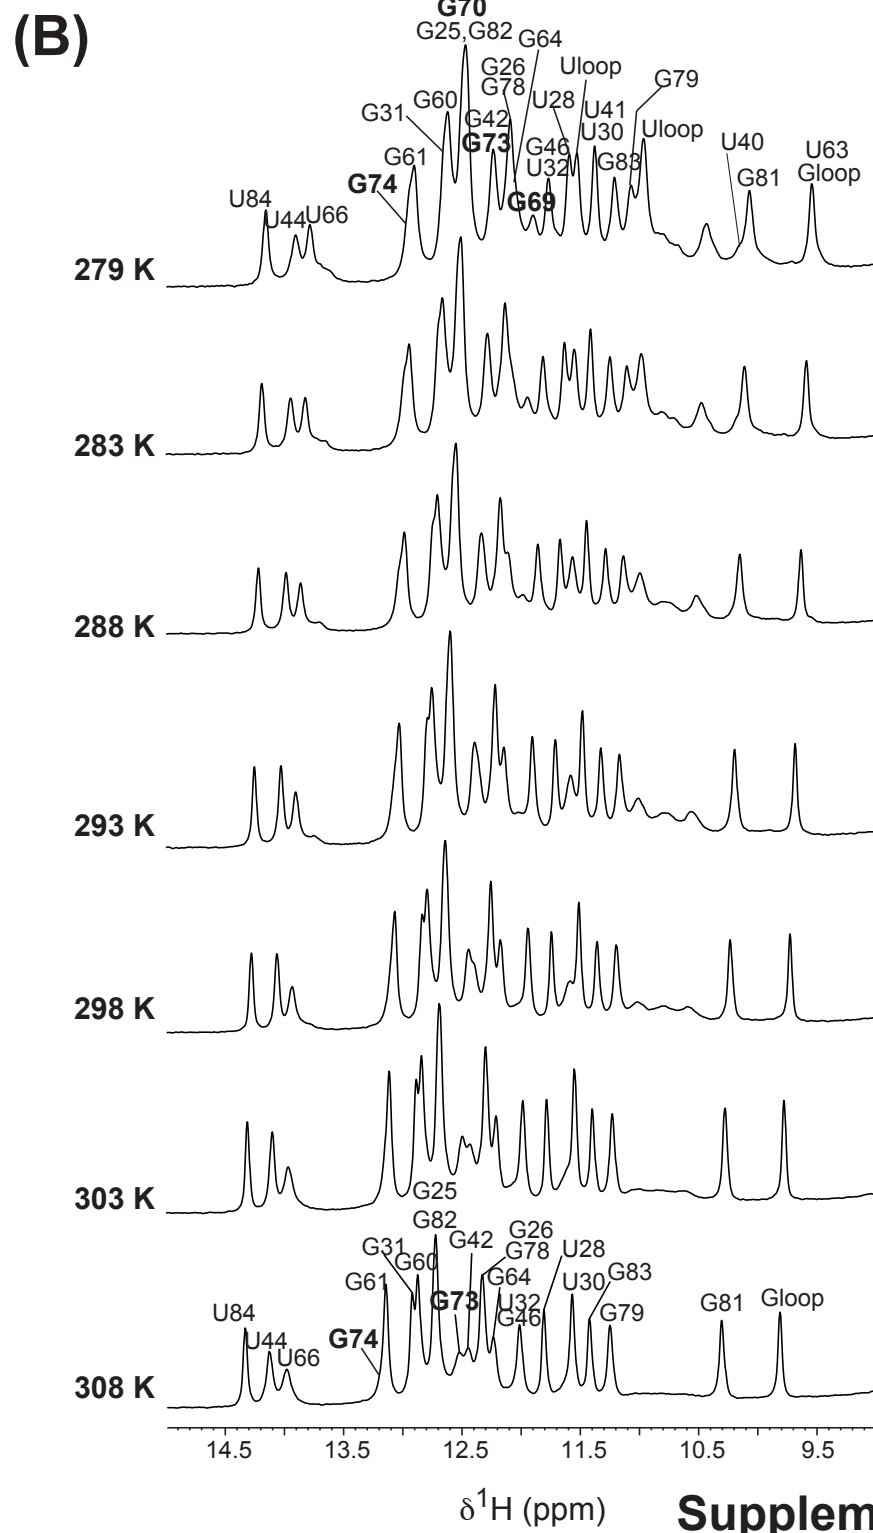

### **Supplemental Figure S7: Temperature-dependence of HPI-wt and HPI**

Spectra of (A) HPI-wt and (B) HPI were recorded in 50 mM sodium phosphate buffer at pH 6.2, containing 90/10 H<sub>2</sub>O/D<sub>2</sub>O. The resonances corresponding to G69-H1, G70-H1, G73-H1 and G74-H1 are broadened, which is characteristic of a fast exchange with the solvent, indicating a short life-time for these base-pairs. At 308 K, the imino protons of G69 and G70 could not be detected any more. G73-H1 and G74-H1 broaden upon increasing temperature, indicating a destabilization of these two base-pairs. The cross-peaks observable for these residues, in NOESY experiments, progressively broadened upon increased temperature.
