# Supplementary material for: Solution structure of the 5′-terminal hairpin of the 7SK small nuclear RNA
Source: PubMed Central journal article supplement — RNA. 2016 Dec;22(12):1844–58. doi: 10.1261/rna.056523.116 (PMC5113205; doi:10.1261/rna.056523.116), 2016-12
Supplement: supp_056523.116_Supplemental_Fig_S8.pdf [file supp_056523.116_Supplemental_Fig_S8.pdf]

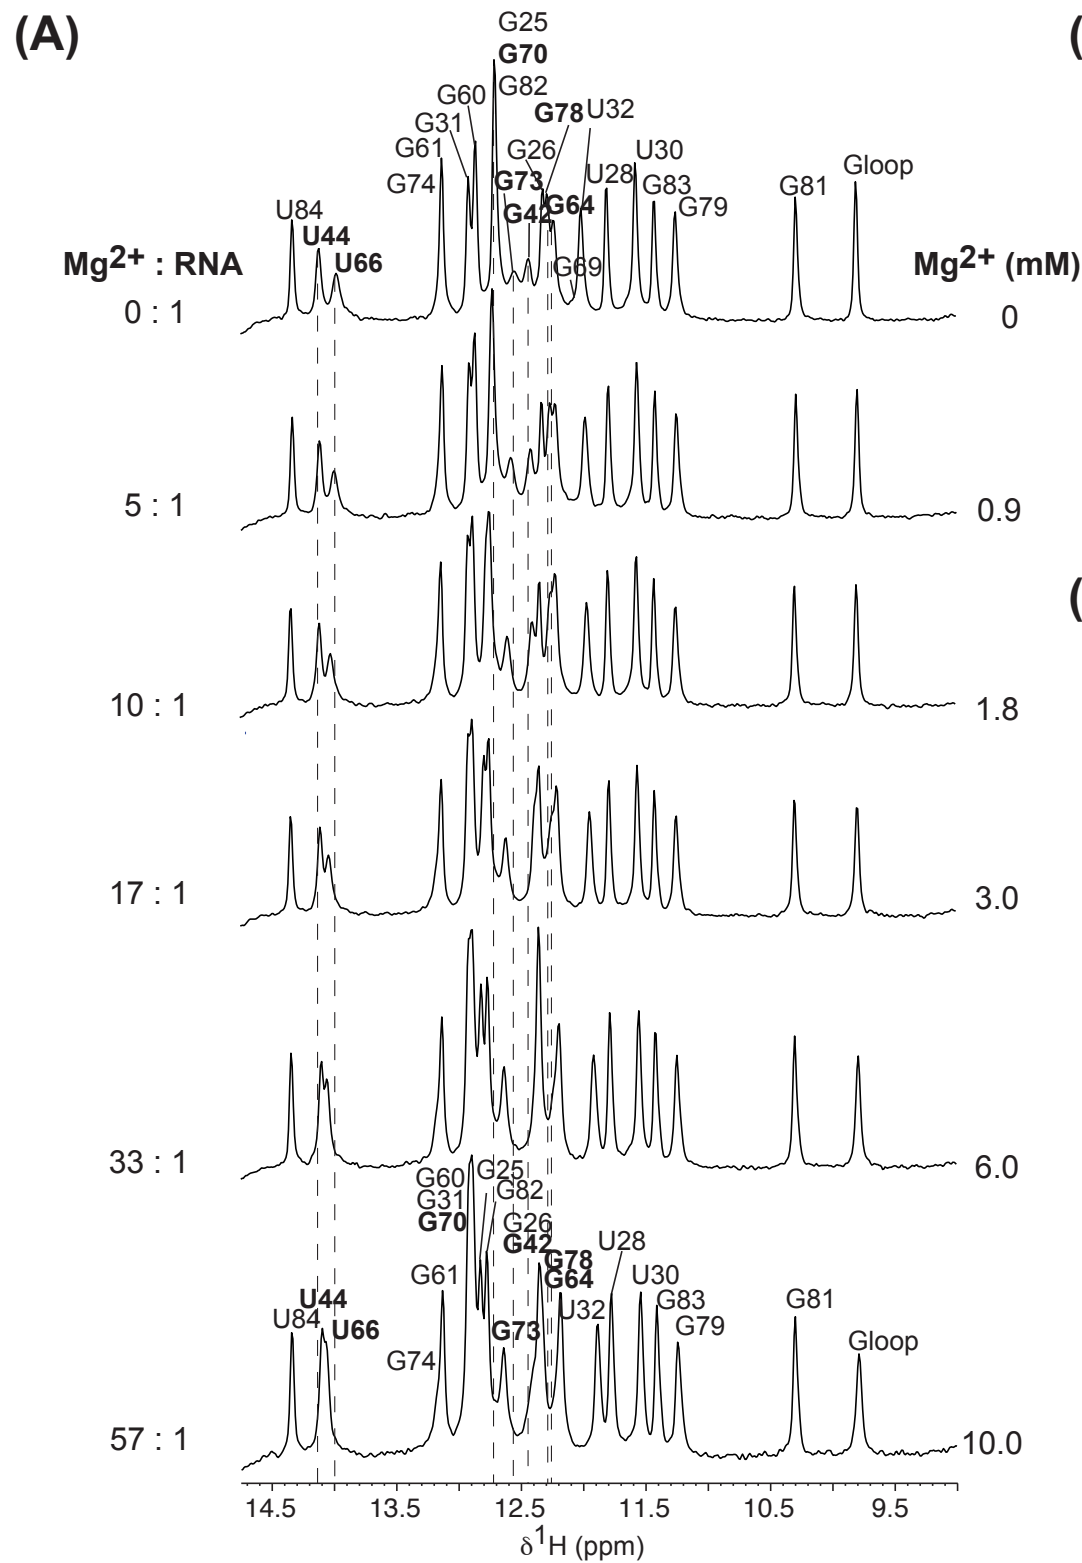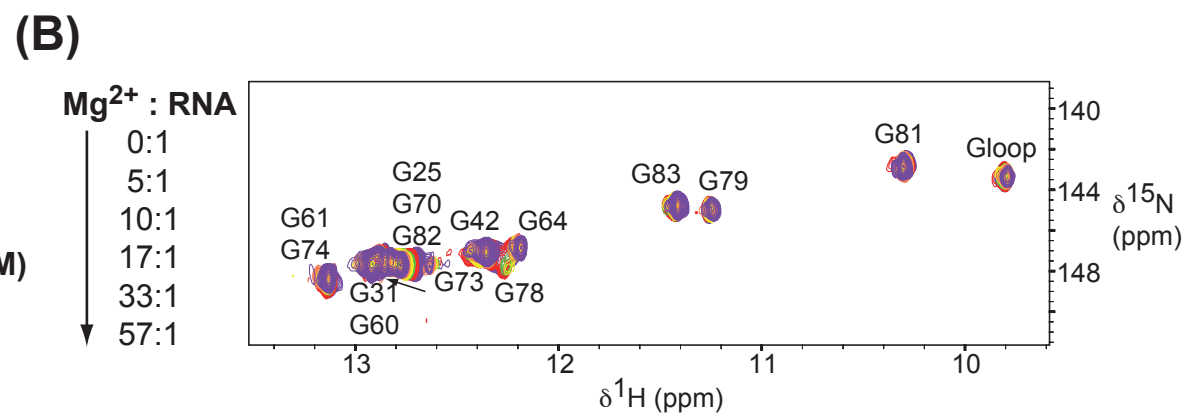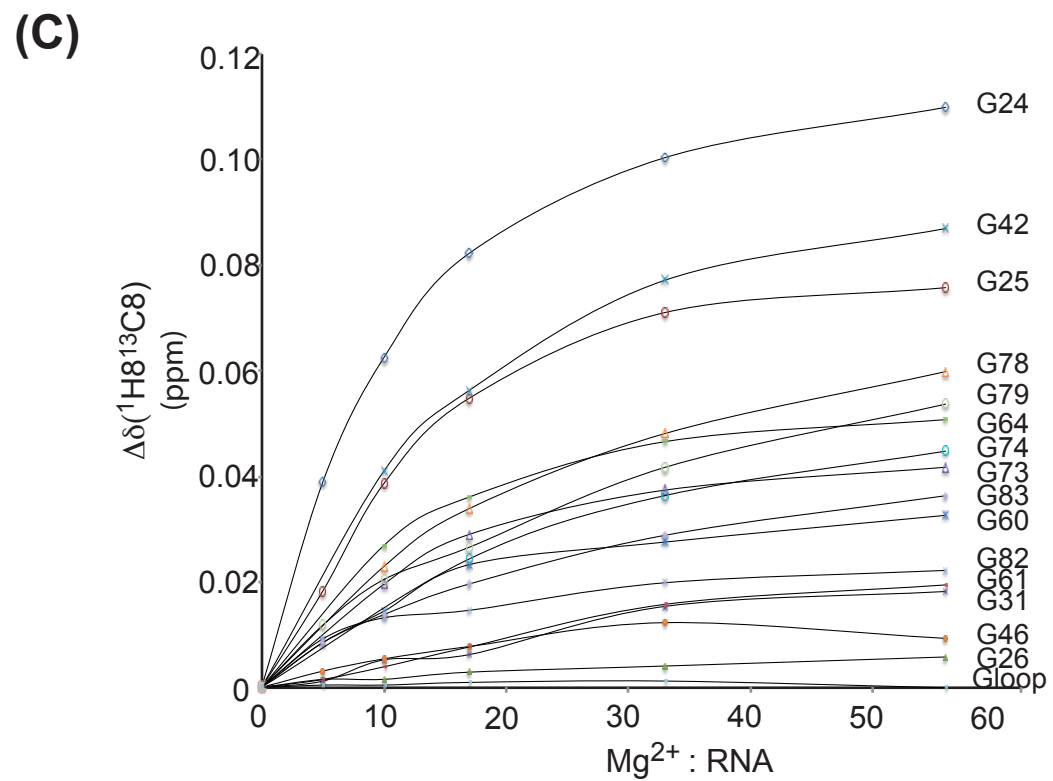

**Supplemental Figure S8**

### Supplemental Figure S8: Titration of HPI RNA by Mg<sup>2+</sup>

(A) Imino-protons region of 1D spectra recorded at 15°C in 50 mM sodium phosphate buffer (pH 6.2) at different magnesium chloride concentrations. The ratio (Mg<sup>2+</sup>:RNA) and the Mg<sup>2+</sup> concentration are indicated on the left and on the right, respectively. Broken lines and bold assignments indicate imino protons that undergo variations. (B) Overlays of regions of <sup>1</sup>H-<sup>15</sup>N HSQC spectra showing the imino proton H1-N1 of selectively labeled [<sup>13</sup>C/<sup>15</sup>N-G] HPI at 30°C, Mg<sup>2+</sup>-free (black) and upon successive additions of magnesium. Arrows indicate the cross-peaks that shifted upon addition of magnesium. (C) Chemical shifts changes of the <sup>1</sup>H<sub>8c</sub> and <sup>13</sup>C<sub>8</sub> ( $\Delta\delta_{ave} = [(\Delta\delta^{1H})^2 + (\gamma_C/\gamma_H)^2 * (\Delta\delta^{13C})^2]^{1/2}$ ) upon titration of selectively labeled [<sup>13</sup>C/<sup>15</sup>N-G] HPI with Mg<sup>2+</sup> are plotted as a function of the Mg<sup>2+</sup>:RNA ratio.
