# Supplementary material for: Solution structure of the 5′-terminal hairpin of the 7SK small nuclear RNA
Source: PubMed Central journal article supplement — RNA. 2016 Dec;22(12):1844–58. doi: 10.1261/rna.056523.116 (PMC5113205; doi:10.1261/rna.056523.116), 2016-12
Supplement: supp_056523.116_Supplemental_Fig_S9.pdf [file supp_056523.116_Supplemental_Fig_S9.pdf]

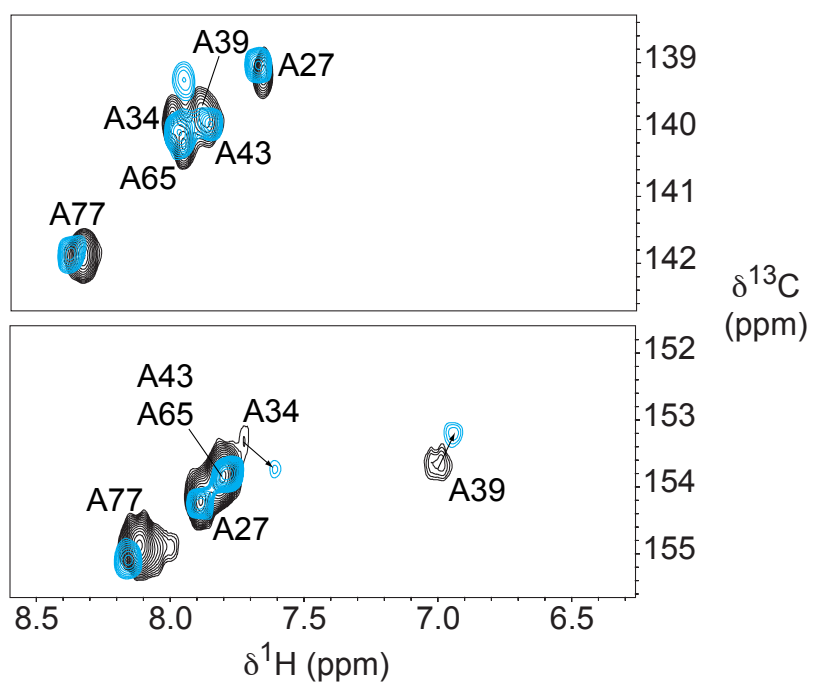

**Supplemental Figure 9**

**Supplemental Figure S9: Titration of HPI RNA by Mg<sup>2+</sup>**

Overlays of regions of <sup>1</sup>H-<sup>13</sup>C HSQC spectra showing the aromatic H8-C8 and H2-C2 of selectively labeled [<sup>13</sup>C/<sup>15</sup>N-A] HPI at 30°C, Mg<sup>2+</sup>-free (black) and with 3 mM magnesium. Arrows indicate the cross-peaks that shifted upon addition of magnesium.
